# Supplementary material for: Metal–semiconductor–metal transition in zigzag carbon nanoscrolls
Source: Royal Society of Chemistry journal article supplement (doi:10.1039/c5nr07628e), 2015-12-30
Supplement: c5nr07628e1.pdf [file c5nr07628e1.pdf]

## Supporting Information

### Metal-semiconductor-metal transition in zigzag carbon nanoscrolls

Haixia Dong<sup>a,b</sup>, Yang Zhang<sup>a,\*</sup>, Dangqi Fang<sup>a</sup>, Baihua Gong<sup>a</sup>, Erhu Zhang<sup>a</sup>, and Shengli Zhang<sup>a,\*</sup>

<sup>a</sup> Department of Applied Physics, Xi'an Jiaotong University, Xi'an 710049, China

<sup>b</sup> Institute of Solid State Physics, Shanxi Datong University, Datong 037009, China

Table of contents:

1. The results of ACNSs
2. Partial density of states of the edge C atoms in ZCNSs

1. The calculated results of ACNSs.

Using first-principles calculations, we have also investigated electronic properties of ACNSs during their rolling processes from GNRs by bending deformation. The results are summarized in [Table S1](#). From this table, it can be seen that all the ACNSs with different widths exhibit semiconducting behaviors during their rolling processes, which indicates that electronic properties transition (e.g., a metal-semiconductor-metal transition in ZCNSs) is not observed in the ACNSs. Thereby, the focus of our study is solely on the ZCNSs.

**Table S1** Properties of *n*-ACNSs (*n* represents dimer lines in ACNS): distance between two edges  $d_{C-C}$  (Å) and band gap  $E_g$  (eV) (N: non-overlapped edges, O: overlapped edges).

| ACNSs     | 33-ACNS |      |      |      |      | 35-ACNS |      |      |      |      | 37-ACNS |      |      |      |      |
|-----------|---------|------|------|------|------|---------|------|------|------|------|---------|------|------|------|------|
| $d_{C-C}$ | 9.97    | 3.87 | 3.40 | 4.05 | 6.12 | 8.45    | 4.26 | 3.40 | 4.20 | 7.41 | 6.86    | 3.45 | 3.40 | 3.88 | 7.20 |
| types     | N       | N    | O    | O    | O    | N       | N    | O    | O    | O    | N       | N    | O    | O    | O    |
| $E_g$     | 0.23    | 0.23 | 0.18 | 0.18 | 0.21 | 0.07    | 0.08 | 0.05 | 0.09 | 0.10 | 0.32    | 0.32 | 0.33 | 0.34 | 0.32 |

\* Corresponding author. Tel./fax.: +86 29 82668559.

E-mail address: zhangsl@mail.xjtu.edu.cn (S.L. Zhang), yzhang520@mail.xjtu.edu.cn.

## 2. Partial density of states of the edge C atoms in ZCNSs.

Fig. S1† displays partial density of states (PDOSs) of the edge C atoms in N-ZCNSs and O-ZCNSs. It is clear to see that the Fermi level of metallic ZCNSs and the VBM and CBM of semiconducting ZCNSs are mainly contributed by the C  $p$  orbital of edges in spite of their two edges overlapped or non-overlapped. Thus, the electronic contributions of O-ZCNSs are similar to those of N-ZCNSs whether they are metallic or semiconducting.

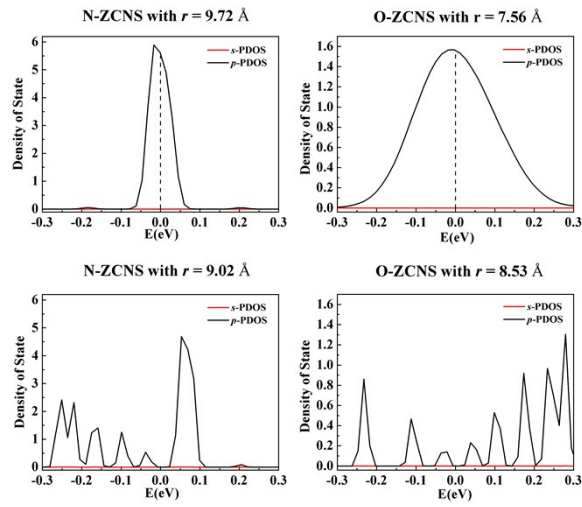

Fig. S1† Partial density of states (PDOSs) of the edge C atoms for: N-ZCNSs and O-ZCNSs. The Fermi level is set to zero.
